1

Version dated: December 21, 2017

2 RH: Phasing improves utility of UCEs

3 **Allele Phasing Greatly Improves the Phylogenetic**  
4 **Utility of Ultraconserved Elements**

5 TOBIAS ANDERMANN<sup>1,2</sup>, ALEXANDRE M. FERNANDES<sup>3</sup>, URBAN OLSSON<sup>1,2</sup>, MATS  
6 TÖPEL<sup>2,4</sup>, BERNARD PFEIL<sup>1,2</sup>, BENGT OXELMAN<sup>1,2</sup>, ALEXANDRE ALEIXO<sup>5</sup>, BRANT C.  
7 FAIRCLOTH<sup>6</sup> AND ALEXANDRE ANTONELLI<sup>1,2,7</sup>

8 <sup>1</sup>*Department of Biological and Environmental Sciences, University of Gothenburg, SE-41319,*  
9 *Goteborg, Sweden;*

10 <sup>2</sup>*Gothenburg Global Biodiversity Centre, Box 461, SE-405 30, Göteborg, Sweden*

11 <sup>3</sup>*Universidade Federal Rural de Pernambuco, Serra Talhada, Brazil*

12 <sup>4</sup>*Department of Marine Sciences, University of Gothenburg, SE-41319, Göteborg, 41319, Sweden;*

13 <sup>5</sup>*Museu Paraense Emílio Goeldi, Collection of Birds, Belém, Brazil*

14 <sup>6</sup>*Department of Biological Sciences and Museum of Natural Science, Louisiana State University,*  
15 *Baton Rouge, LA, U.S.A.*

16 <sup>7</sup>*Gothenburg Botanical Garden, Göteborg, SE-41319, Sweden*

17 **Corresponding author:** Tobias Andermann, Department of Biological and  
18 Environmental Sciences, University of Gothenburg, Carl Skottsbergs Gata 22B, Göteborg,  
19 41319, Sweden; E-mail: tobias.hofmann@bioenv.gu.se

20 *Abstract.*— Advances in high-throughput sequencing techniques now allow relatively easy  
21 and affordable sequencing of large portions of the genome, even for non-model organisms.  
22 Many phylogenetic studies prefer to reduce costs by focusing their sequencing efforts on a  
23 selected set of targeted loci, commonly enriched using sequence capture. The advantage of  
24 this approach is that it recovers a consistent set of loci, each with high sequencing depth,  
25 which leads to more confidence in the assembly of target sequences. High sequencing depth  
26 can also be used to identify phylogenetically informative allelic variation within sequenced  
27 individuals, but allele sequences are infrequently assembled in phylogenetic studies.  
28 Instead, many scientists perform their phylogenetic analyses using contig sequences which  
29 result from the *de novo* assembly of sequencing reads into contigs containing only canonical  
30 nucleobases, and this may reduce both statistical power and phylogenetic accuracy. Here,  
31 we develop an easy-to-use pipeline to recover allele sequences from sequence capture data,  
32 and we use simulated and empirical data to demonstrate the utility of integrating these  
33 allele sequences to analyses performed under the Multispecies Coalescent (MSC) model.  
34 Our empirical analyses of Ultraconserved Element (UCE) locus data collected from the  
35 South American hummingbird genus *Topaza* demonstrate that phased allele sequences carry  
36 sufficient phylogenetic information to infer the genetic structure, lineage divergence, and  
37 biogeographic history of a genus that diversified during the last three million years, support  
38 the recognition of two species, and suggest a high rate of gene flow across large distances of  
39 rainforest habitats but rare admixture across the Amazon River. Our simulations show  
40 that analyzing allele sequences leads to more accurate estimates of tree topology and  
41 divergence times than the more common approach of using contig sequences. We conclude  
42 that allele phasing may be the most appropriate processing scheme for phylogenetic  
43 analyses of UCE data in particular, and sequence capture data, more generally.  
44 (Keywords: UCE, SNP, heterozygous sites, Multispecies Coalescent, gene tree, species tree,  
45 Mitochondrial Genome, Trochilidae, Birds, Amazon)

46 Massive Parallel Sequencing (MPS) techniques enable time- and cost-efficient  
47 generation of DNA sequence data. Instead of using MPS to sequence complete genomes,  
48 many researchers choose to focus their sequencing efforts on a set of target loci to lower  
49 costs while achieving higher coverage and more reliable sequencing of these target regions  
50 (Faircloth et al. 2012, 2013; Mirarab et al. 2014; Smith et al. 2014; Faircloth 2015; Harvey  
51 et al. 2016; Meiklejohn et al. 2016). These multilocus datasets typically contain hundreds  
52 or thousands of target loci, and most are generated through enrichment techniques such as  
53 sequence capture (synonym: target enrichment, Gnrirke et al. (2009)). After collecting  
54 sequence data from these targeted loci, many researchers assemble their high coverage  
55 sequence reads into “contigs” using *de novo* genome assembly software, and the “contigs”  
56 output by these assemblers often ignore the variants at heterozygous positions that are  
57 expected in diploid organisms. Typically, variable positions are treated as sequencing errors  
58 and assembly algorithms output the contig containing the more probable (i.e., numerous)  
59 variant while discarding the alternative (Iqbal et al. 2012). As a result, the contigs that are  
60 produced contain only canonical nucleobases, losing the information for each alternative  
61 allele present at each variable position (Fig. 4). Hereafter, we use “contigs” and “contig  
62 sequences” to refer to the sequences that are output by *de novo* assemblers.

63 One alternative approach to generating contig sequences uses the depth of  
64 sequencing coverage to programatically identify variable positions within a targeted locus  
65 (also known as “calling” single nucleotide polymorphism (SNPs)) and subsequently sorting  
66 (or “phasing”) these SNPs into two allele sequences or “haplotypes” which represent alleles  
67 on the same chromosome present at that locus. These approaches have been used to  
68 estimate demographic parameters such as effective population size, rate of migration, and  
69 the amount of gene flow between and within populations. However, it is rarely  
70 acknowledged (*c.f.* Lischer et al. 2014; Potts et al. 2014; Schrempf et al. 2016; Eriksson  
71 et al. 2017) that allelic sequences are useful for phylogenetic studies to improve the

72 estimation of gene trees, species trees, and divergence times (Garrick et al. 2010; Potts  
73 et al. 2014; Lischer et al. 2014). The common practice of neglecting allelic information in  
74 phylogenetic studies possibly results from historical inertia and a lack of computational  
75 pipelines to prepare allele sequences for phylogenetic analysis using MPS data.

76 In addition to the problems of determining allelic sequences, the proper analysis of  
77 allelic information in phylogenetic studies remains a challenging and intensively discussed  
78 topic (Garrick et al. 2010; Lischer et al. 2014; Potts et al. 2014; Schrempf et al. 2016;  
79 Leaché and Oaks 2017). Various approaches have been proposed to include this information  
80 into phylogenetic methods (Lischer et al. 2014; Potts et al. 2014; Schrempf et al. 2016).  
81 One is to code heterozygous sites using IUPAC ambiguity codes and to include these as  
82 additional characters in existing substitution models for gene tree and species tree inference  
83 (Potts et al. 2014; Schrempf et al. 2016). While these studies demonstrate that integrating  
84 additional allelic information in this manner increases accuracy in phylogenetic inference,  
85 Lischer et al. (2014) found that coding heterozygous sites as IUPAC ambiguity codes in  
86 phylogenetic models biases the results toward older divergence time estimates. Instead,  
87 Lischer et al. (2014) introduced a method of repeated random haplotype sampling (RRHS)  
88 in which allele sequences are repeatedly concatenated across many loci, using a random  
89 haplotype for any given locus in each replicate. In their approach they then analyzed  
90 thousands of concatenation replicates separately for phylogenetic tree estimation and  
91 summarized the results between replicates, thereby integrating the allelic information in  
92 form of uncertainty intervals. However there are two important shortcomings of this  
93 approach: 1. concatenating unlinked loci (and in particular allele sequences from unlinked  
94 loci) in a random manner is known to produce incorrect topologies (Degnan and Rosenberg  
95 2009) often with false confidence (Edwards et al. 2007; Kolaczkowski and Thornton 2004;  
96 Kubatko and Degnan 2007; Mossel and Vigoda 2005), which is not accounted for when  
97 doing so repeatedly and summarizing the resulting trees, and 2. running thousands of tree

98 estimation replicates based on extensive amounts of sequence data results in unfeasibly long  
99 computation times, particularly for Markov-Chain Monte Carlo (MCMC) based softwares  
100 such as MrBayes or BEAST. Hence there is need to find proper solutions to include  
101 heterozygous information in phylogenetic analyses, as concluded by Lischer et al. (2014).

102 Here, we introduce the bioinformatic assembly of allele sequences from UCE data  
103 and demonstrate a full integration of allele sequences to species tree estimation under the  
104 multispecies coalescent (MSC) model using empirical and simulated data. In our approach,  
105 we treat each allelic sequence of an individual at a given locus as an independent sample  
106 from the population, and we analyze these sequences using the species tree and  
107 delimitation software STACEY (Jones et al. 2014; Jones 2017), which does not require *a*  
108 *priori* clade- or species-assignments. We first demonstrate the empirical utility of our  
109 approach by resolving the shallow genetic structure (<1 Ma) within two recognized  
110 morphospecies of the South American hummingbird genus *Topaza* by analyzing a set of  
111 2,386 ultraconserved elements (UCEs, see Faircloth et al. (2012)) collected using sequence  
112 capture of the 2.5k tetrapod baitset (see <http://ultraconserved.org>). We then validate  
113 this approach, using simulations, and show that allele sequences yield more accurate results  
114 in terms of species tree estimation and species delimitation than the contig sequence  
115 approach that ignores heterozygous information. Our simulation results further  
116 demonstrate that proper phasing of allele sequences outperforms alternative approaches of  
117 coding heterozygous information, such as analyzing sequences containing IUPAC ambiguity  
118 codes or SNPs. We conclude by demonstrating that phasing sequence capture data can be  
119 critical for correct species delimitation and phylogeny estimation, particularly in recently  
120 diverged groups, and that analyses using phased alleles should be considered as one “best  
121 practice” for analyzing sequence capture datasets in a phylogenetic context.

123

## *Study System*

124

125

126

127

128

129

130

131

132

133

134

135

136

137

138

139

140

The genus *Topaza* and its sister genus *Florisuga* form the Topazes group, which together with the Hermits represent the most ancient branch within the hummingbird family (Trochilidae) (McGuire et al. 2014). Topazes are estimated to have diverged as a separate lineage from all other hummingbirds around 21.5 Ma, whereas the most recent common ancestor (MRCA) of *Topaza* and *Florisuga* lived approximately 19 Ma (McGuire et al. 2014). At present, there are two morphospecies recognized within *Topaza*, namely the Fiery Topaz, *T. pyra* (Gould, 1846), and the Crimson Topaz, *T. pella* (Linnaeus, 1758). However, the species status of *T. pyra* has been challenged by some authors (Schuchmann 1999; Ornés-Schmitz and Schuchmann 2011), who consider this genus to be monotypic. Topaz hummingbirds are endemic to the Amazonian rainforest and are some of the most spectacular and largest hummingbirds worldwide, measuring up to 23 cm (adult males, including tail feathers) and weighing up to 12 g (Schuchmann et al. 2016; del Hoyo et al. 2016a). These birds are usually found in the forest canopy along forest edges and clearings, and are often seen close to river banks (Ornés-Schmitz and Schuchmann 2011). There is morphological evidence for several subspecies within both currently recognized *Topaza* species (Peters 1945; Schuchmann 1999; Hu et al. 2000; Ornés-Schmitz and Schuchmann 2011) that we investigate using genetic data.

141

## *Sequence Data Generation*

142

143

144

145

146

We extracted DNA from the muscle tissue of 10 vouchered hummingbirds (9 *Topaza*, one *Florisuga*, see Table 1) using the Qiagen DNeasy Blood and Tissue Kit according to the manufacturer's instructions (Qiagen GmbH, Hilden, Germany). These samples cover most of the genus' total geographic range (Fig. 1) and all morphologically recognized intraspecific taxa (Schuchmann et al. 2016; del Hoyo et al. 2016a). All samples

Table 1: Specimens sequenced. Subspecies identifications based on morphological characters. Abbreviation for sample providers: INPA = Instituto Nacional de Pesquisas da Amazônia, MPEG = Museum Paraense Emílio Goeldi, USNM = NMNH, Smithsonian Institution, Washington DC, USA.

| ID | Taxon                  | Subspecies          | Voucher number | Latitude  | Longitude |
|----|------------------------|---------------------|----------------|-----------|-----------|
| 1  | <i>Topaza pyra</i>     | <i>amaruni</i>      | INPA A1106     | -0.044167 | -66.94944 |
| 2  | <i>T. pyra</i>         | <i>pyra</i>         | MPEG 62475     | -1.559444 | -65.88006 |
| 3  | <i>T. pyra</i>         | <i>pyra</i>         | MPEG 62474     | -4.083889 | -60.66050 |
| 4  | <i>T. pyra</i>         | <i>pyra</i>         | MPEG 52721     | -7.350000 | -73.66667 |
| 5  | <i>T. pella</i>        | NA                  | USNM 586322    | 7.220000  | -60.29000 |
| 6  | <i>T. pella</i>        | <i>pella</i>        | INPA A3319     | -1.927900 | -59.41600 |
| 7  | <i>T. pella</i>        | <i>smaragdula</i>   | MPEG 61688     | -1.950000 | -51.60000 |
| 8  | <i>T. pella</i>        | <i>microrhyncha</i> | MPEG 65603     | -5.352417 | -57.47500 |
| 9  | <i>T. pella</i>        | NA                  | INPA A6233     | -9.028550 | -64.24231 |
| 10 | <i>Florisuga fusca</i> | NA                  | MPEG 70697     | -15.15972 | -39.04500 |

147 were sonicated with a Covaris S220 to a fragment length of 800 bp. Paired-end,  
148 size-selected (range 600-800bp) DNA libraries were prepared for sequencing on the Illumina  
149 MiSeq platform, using the magnetic-bead based NEXTFlex™ Rapid DNA-Seq Kit (Bio  
150 Scientific Corporation, Austin, TX, USA), following the user’s manual (v14.02).

151 We used the “Tetrapods-UCE-2.5Kv1” bait set (`uce-2.5k-probes.fasta`),  
152 consisting of 2,560 baits (each 120 bp), targeting 2,386 UCEs, as described by Faircloth  
153 et al. (2012). The bait sequences were downloaded from <http://ultraconserved.org> and  
154 synthesized by MYcroarray (Biodiscovery LLC, Ann Arbor, MI, USA). Sequence  
155 enrichment was performed using a MYbaits kit according to the enclosed user manual  
156 (v1.3.8). The enriched libraries were then sequenced using 250 bp, paired-end sequencing  
157 on an Illumina MiSeq machine (Illumina Inc., San Diego, CA, USA). Library preparation,  
158 sequence enrichment and sequencing were performed by Sahlgrenska Genomics Core  
159 Facility in Gothenburg, Sweden.

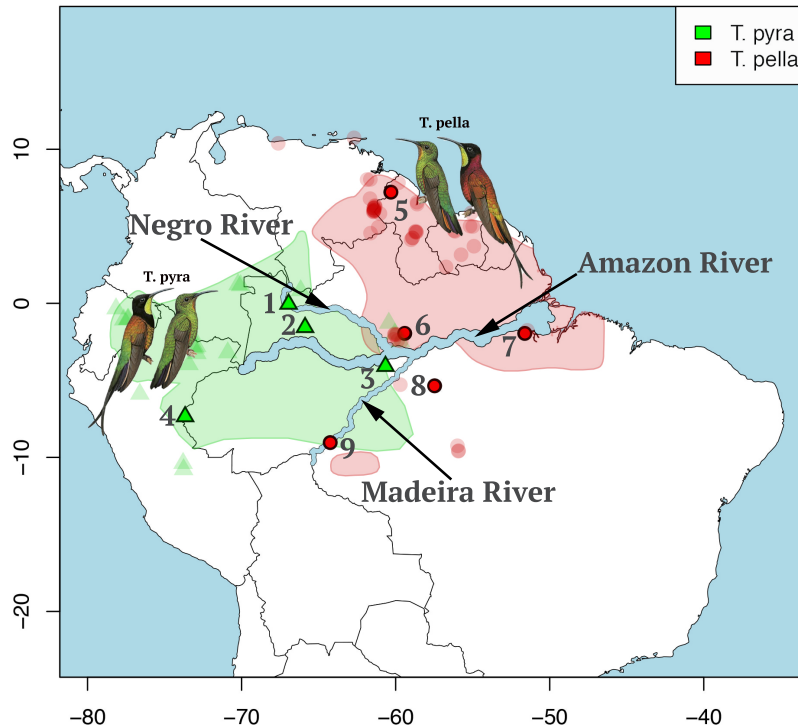

Figure 1: Sample locations of *Topaza* specimens (numbered symbols) in northern South America. Numbers represent sample IDs (Table 1). The colored polygons show the distribution range of the two morphospecies (*T. pyra* = green, *T. pella* = red) as estimated by BirdLife International (<http://www.birdlife.org>). Transparent symbols (triangles and circles) represent *Topaza* sightings, which were downloaded from the eBird database (Sullivan et al. 2009). The major river systems in the Amazon drainage basin are marked in blue (not in proportion). *Topaza* illustrations were provided by del Hoyo et al. (2016b).

161 To infer a dated mitochondrial phylogeny for the genus *Topaza* to compare with the  
162 nuclear phylogeny, we used off-target mitochondrial reads to assemble the complete  
163 mitochondrial genome for all samples. We found that as many as 4.5% of all sequence  
164 reads were of mitochondrial origin, even though no baits targeting mitochondrial loci were  
165 used during sequence capture. An alignment of the assembled mitochondrial genomes for  
166 all samples was analyzed in BEAST (Drummond et al. 2012). Dating priors included  
167 clock-rate priors for three mitochondrial genes, estimated for honeycreepers by Lerner et al.  
168 (2011) and node-age priors within the genus *Topaza* that were estimated by McGuire et al.



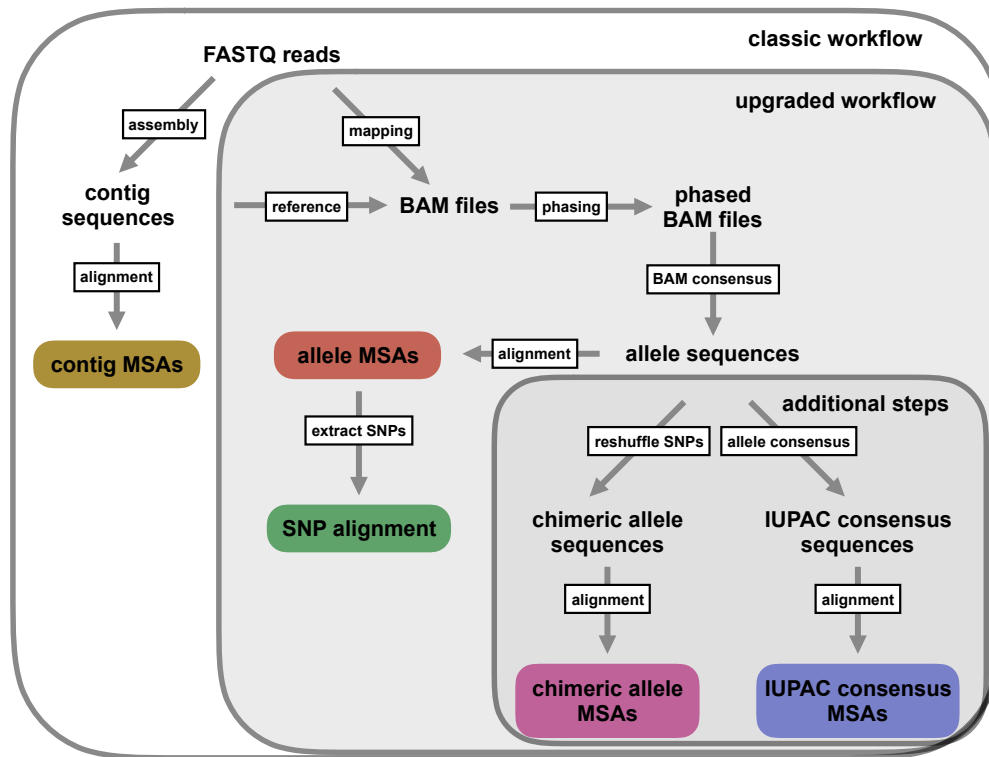

Figure 2: Depiction of the workflow developed here. Colored boxes represent different types of multiple sequence alignments (MSAs) used for phylogenetic inference in this study. In addition to the standard UCE workflow of generating contig MSAs (Faircloth et al. 2012; Smith et al. 2014; Faircloth 2015), we extended the bioinformatic processing in order to generate UCE allele MSAs, and to extract SNPs from these allele MSAs. We added these new functions to the PHYLUCE pipeline (Faircloth 2015). Additional data processing steps were executed in this study in order to test different codings of heterozygous positions.

169 (2014). A detailed description of the assembly and analysis of the mitochondrial genome  
 170 data can be found in online Appendix 1 (Supplemental Material available on Dryad).

### 171 *UCE Data Processing*

172 For this study we generated five different types of datasets, which we analyzed under the  
 173 MSC. These five datasets represent different coding schemes for heterozygous information  
 174 and are listed and described in the following sections.

175 1. *UCE contig alignments*.— Because contig sequences are commonly used in phylogenetic  
176 analyses of MPS datasets (e.g. Faircloth et al. (2012); Smith et al. (2014); Faircloth  
177 (2015)), we generated multiple sequence alignments (MSAs) of contigs for all UCE loci in  
178 order to test the accuracy of the phylogenetic estimation of this approach.

179 To create MSAs from UCE contig data, we followed the suggested workflow from  
180 the PHYLUCE documentation  
181 (<http://phyluce.readthedocs.io/en/latest/tutorial-one.html>). We applied the  
182 PHYLUCE default settings unless otherwise stated. First we quality-filtered and cleaned  
183 raw Illumina reads of adapter contamination with Trimmomatic (Bolger et al. 2014), which  
184 is implemented in the PHYLUCE function `illumiprocessor`. The reads were then  
185 assembled into contigs using the software ABYSS (Simpson et al. 2009) as implemented in  
186 the PHYLUCE pipeline. In order to identify contigs representing UCE loci, all assembled  
187 contigs were mapped against the UCE reference sequences from the bait sequence file  
188 (`uce-2.5k-probes.fasta`), using the PHYLUCE function `match_contigs_to_probes.py`.  
189 We extracted only those sequences that matched UCE loci and that were present in all  
190 samples (n=820). These UCE sequences were then aligned for each locus (Fig. 2) using  
191 MAFFT (Katoh et al. 2009).

192 2. *UCE allele alignments*.— We altered the typical UCE workflow in order to retrieve the  
193 allelic information that is lost when collapsing multiple reads into a single contig sequence  
194 (Fig. 2). To create this new workflow, we extracted all UCE contigs for each sample  
195 separately and treated each resulting contig set as a sample-specific reference library for  
196 read mapping. We then mapped the cleaned reads against each reference library on a per  
197 sample basis, using CLC-mapper from the CLC Workbench software. The mapped reads  
198 were sorted and then phased with SAMtools v0.1.19 (Li et al. 2009), using the commands  
199 `samtools sort` and `samtools phase`, respectively. This phasing function is based on a

200 dynamic programming algorithm that uses read connectivity across multiple variable sites  
201 to determine the two phases of any given diploid locus (He et al. 2010). Further, this  
202 algorithm uses paired-end read information to reach connectivity over longer distances and  
203 it minimizes the problem of accidentally phasing a sequencing error, by applying the  
204 minimum error correction function (He et al. 2010).

205 UCE data provide an excellent dataset for allele phasing based on read connectivity,  
206 because the read coverage across any given UCE locus typically is highest in the center and  
207 decreases toward the ends. This makes it possible to phase throughout the complete locus  
208 without any breaks in the sequence. Even in cases where the only variable sites are found  
209 on opposite ends of the locus, the insert size we targeted in this study (800 bp), in  
210 combination with paired-end sequencing, enabled the phasing process to bridge the  
211 complete locus. The two phased output files (BAM format) were inspected for proper  
212 variant separation for all loci using Tablet (Milne et al. 2013). We then collapsed each  
213 BAM file into a single sequence and exported the two resulting allele sequences for each  
214 sample in FASTA format. In the next, step we aligned the allele sequences between all  
215 samples, separately for each UCE locus, using MAFFT (Fig. 2). We integrated this  
216 complete workflow into the UCE processing software PHYLUCE (Faircloth 2015) with  
217 slight alterations, one of which is the use of the open-source mapping program bwa (Li and  
218 Durbin 2010) in place of CLC-mapper.

219 *3. UCE IUPAC consensus sequence alignments.*— We generated an additional set of  
220 alignments by merging the two allele sequences for each individual into one consensus  
221 sequence with heterozygous sites coded as IUPAC ambiguity codes  
222 (`merge_allele_sequences_ambiguity_codes.py`, available from:  
223 [github.com/tobiashofmann88/UCE-data-management/](https://github.com/tobiashofmann88/UCE-data-management/)). We used this dataset to test  
224 whether our allele phasing approach improved phylogenetic inference when compared to

225 the IUPAC consensus approach applied in other studies (where heterozygous positions are  
226 simply coded as IUPAC ambiguity codes in a consensus sequence for each locus and  
227 individual (Potts et al. 2014; Schrepf et al. 2016)).

228 *4. UCE chimeric allele alignments.*— To investigate whether correct phasing of  
229 heterozygous sites is essential or if similar results are achieved by randomly placing  
230 variants in either allele sequence, we generated a dataset with chimeric allele sequence  
231 alignments. We created these alignments by applying a custom python script  
232 (`shuffle_snps_in_allele_alignments.py`, available from:  
233 [github.com/tobiashofmann88/UCE-data-management/](https://github.com/tobiashofmann88/UCE-data-management/)) to the phased allele sequence  
234 alignments and randomly shuffling the two variants at each polymorphic position between  
235 the two allele sequences for each individual. This process leads, in many cases, to an  
236 incorrect combination of variants on each allele sequence, thereby creating chimeric allele  
237 sequences. The resulting alignments contain the same number of sequences as the phased  
238 allele alignments (two sequences per individual), whereas the contig alignments and the  
239 IUPAC consensus alignments contain only half as many sequences (one sequence per  
240 individual).

241 *5. UCE SNP alignment.*— A common approach to analyze heterozygous information is to  
242 reduce the sequence information to only a single variant SNP per locus. This  
243 data-reduction approach is often chosen because multilocus datasets of the size generated  
244 in this study can be incompatible with Bayesian MSC methods applied to the full sequence  
245 data, due to extremely long computational times. Instead, alignments of unlinked SNPs  
246 can be used to infer species trees and species demographics under the MSC model with the  
247 BEAST2 package SNAPP (Bryant et al. 2012), a program specifically designed for such  
248 data. However, extracting and filtering SNPs from BAM files with existing software (such  
249 as the Genome Analysis Toolkit (GATK), McKenna et al. (2010)) and converting these

250 into a SNAPP compatible format can be cumbersome, because SNAPP requires positions  
251 with exactly two different states, coded in the following manner: individual homozygous for  
252 the original state = “0”, heterozygous = “1”, and homozygous for the derived state = “2”.

253 To alleviate this problem, we developed a python function that extracts biallelic  
254 SNPs directly from allele sequence MSAs (`snps_from_uce_alignments.py`, available from:  
255 [github.com/tobiashofmann88/UCE-data-management/](https://github.com/tobiashofmann88/UCE-data-management/)). Extracting SNPs from MSAs in  
256 this manner is a straightforward and simple way to generate a SNP dataset compatible  
257 with SNAPP, and does not require re-visiting the BAM files. Although a similar program  
258 already exists, which is implemented in the R-package `phrynomics` (Leaché et al. 2015), we  
259 integrated the SNP extraction from allele sequence MSAs into the PHYLUCE pipeline,  
260 and used this approach to extract one position per alignment (to ensure unlinked SNPs)  
261 that had exactly two different states among all *Topaza* samples, not allowing for positions  
262 with missing data or ambiguities. This produced a SNP dataset of 598 unlinked SNPs.

### 263 *Generation of Simulated UCE Data*

264 To assess the accuracy of the phylogenetic inferences resulting from different data  
265 processing approaches, we simulated UCE data similar to those discussed in the five  
266 processing schemes we applied to the empirical *Topaza* data. However, because this  
267 approach required us to simulate allele alignments before generating contig alignments,  
268 steps one and two, below, are reversed from their order, above. For each of the five  
269 processing schemes, we generated and analyzed ten independent simulation replicates.

270 *1. Simulated allele alignments.*— From the empirical UCE allele alignments, we estimated  
271 species divergence times and population sizes under the MSC model (Rannala and Yang  
272 2003) using the Bayesian MCMC program BPP v3.1 (Yang 2015). To do this, we used the  
273 A00 model with the species tree topology from the analysis of the allele sequence data in

274 STACEY, assigning the *Topaza* samples to five separate taxa (corresponding to colored  
275 clades in Fig. 6b). An initial BPP analysis did not converge in reasonable computational  
276 time, a problem that has previously been reported for UCE datasets containing several  
277 hundred loci (Giarla and Esselstyn 2015). To avoid this issue, we split the 820 UCE  
278 alignments randomly into 10 subsets of equal size ( $n=82$ ) and analyzed these separately  
279 with identical settings in BPP. The MCMC was set for 150,000 generations (burn-in  
280 50,000), sampling every 10 generations. We summarized the estimates for population sizes  
281 and divergence times across all 10 individual runs. We then applied the mean values of  
282 these estimates to the species tree topology, by using the estimated divergence times as  
283 branch lengths and estimated population sizes as node values, resulting in the species tree  
284 in Fig. 6g. This tree was used to simulate sequence alignments with the MCcoal simulator,  
285 which is integrated into BPP. Equivalent to the empirical data, we simulated sequence data  
286 for five taxa (D, E, X, Y, and Z) and one outgroup taxon (F, not shown in Fig. 6g). In the  
287 simulations, these taxa were simulated as true species under the MSC model. In order to  
288 mimic the empirical allele data, we simulated four individuals for species ‘D’ (equivalent to  
289 two allele sequences for 2 samples), four for species ‘E’, four for species ‘X’, two for species  
290 ‘Y’ (two allele sequences for one sample), four for species ‘Z’, and two for the outgroup  
291 species ‘F’. In this manner we simulated 820 UCE allele MSAs of 848 bp length (a value  
292 equal to the average alignment length of the empirical allele alignments).

293 *2. Simulated contig alignments.*— To simulate UCE contig MSAs similar to those used in  
294 previous studies (Faircloth et al. 2012; McCormack et al. 2012; Smith et al. 2014; Faircloth  
295 2015) and output by assemblers like Velvet or Trinity which pick only one of the two  
296 variants at a heterozygous site, we merged the sequences within each coalescent species in  
297 pairs of two (equivalent to pairs of allele sequences). Each pair of allele sequences was  
298 joined into one contig sequence by randomly picking one of the two variants at each

299 heterozygous site across all loci. As in the empirical contig assembly approach, our  
300 simulation approach may generate chimeric contig sequences.

301 *3. Simulated IUPAC consensus alignments.*— Next, we generated IUPAC consensus MSAs  
302 in the same manner as we generated the simulated contig MSAs in the previous step, with  
303 the exception that all heterozygous sites were coded with IUPAC ambiguity codes instead  
304 of randomly picking one of the two variants.

305 *4. Simulated chimeric allele alignments.*— We generated chimeric allele sequence MSAs  
306 from the simulated allele MSAs by randomly shuffling the heterozygous sites between each  
307 pair of sequences using the same pairs as in the previous two steps.

308 *5. Simulated SNP alignment.*— Finally, we extracted two different SNP datasets from the  
309 simulated phased allele MSAs. The first SNP dataset (SNPs complete) was extracted in  
310 the same manner as described for the empirical data (one SNP per locus for all loci) which  
311 resulted in a total alignment length of 820 SNPs for the simulated data. We extracted an  
312 additional SNP dataset (SNPs reduced) from only the subset of the 150 simulated allele  
313 alignments that were used for the sequence-based MSC analyses (see next section below).  
314 The resulting dataset of 150 SNPs was used to compare the phylogenetic inference based  
315 on SNP data versus that based on full sequence data, if the same number of loci is being  
316 analyzed. This enabled us to evaluate the direct effect of reducing the full sequence  
317 information in the MSAs to one single SNP for each of the selected 150 loci.

### 318 *MSC Analyses of Empirical and Simulated UCE Data*

319 *Sequence-based tree estimation.*— To jointly infer gene trees and species trees, we analyzed  
320 each of the generated sets of MSAs (processing schemes 1-4 for empirical and simulated)  
321 under the MSC model, using the DISSECT method (Jones et al. 2014) implemented in

322 STACEY (Jones 2017), which is available as a BEAST2 (Bouckaert et al. 2014) package.  
323 STACEY allows \*BEAST analyses without prior taxonomic assignments, searching the tree  
324 space while simultaneously collapsing very shallow clades in the species tree (controlled by  
325 the parameter collapseHeight). This collapsing avoids a common violation of the MSC  
326 model that occurs when samples belonging to the same coalescent species are assigned to  
327 separate taxa in \*BEAST. This feature makes STACEY suitable for analyzing allele  
328 sequences, because they do not have to be constrained to belong to the same taxon and can  
329 be treated as independent samples from a population. STACEY runs with the usual  
330 \*BEAST operators, but integrates out the population size parameter and has new MCMC  
331 proposal distributions to more efficiently sample the species tree, which decreases the time  
332 until convergence. In order to reach even faster convergence, we reduced the number of loci  
333 for this analysis by selecting the 150 allele MSAs with the most parsimony informative  
334 sites. This selection was made for both the empirical and the simulated allele MSAs. The  
335 same 150 loci were selected for all other processing schemes.

336 Prior to analysis, we estimated the most appropriate substitution model for each of  
337 the 150 loci with jModeltest (Supplementary Table S1 available on Dryad) using BIC. We  
338 used BEAUTI v2.4.4 to create an input file for STACEY in which we unlinked substitution  
339 models, clock models and gene trees for all loci. We did not apply any taxon assignments,  
340 thereby treating every sequence as a separate taxon. We chose a strict clock for all loci and  
341 fixed the average clock rate for one random locus to 1.0, while estimating all other clock  
342 rates in relation to this locus. To ensure that all resulting species trees were scaled to an  
343 average clock rate of 1.0, we rescaled every species tree from the posterior distribution  
344 using the average clock rate of the respective MCMC step. We applied the  
345 STACEY-specific BirthDeathCollapse model as a species tree prior, choosing a value of  
346  $1e-5$  for the collapseHeight parameter. Other settings were: bdcGrowthRate = log normal  
347 (M=4.6, S=1.5); collapseWeight = beta (alpha=2, beta=2); popPriorScale = log normal



348 (M=-7, S=2); relativeDeathRate = beta (alpha=1.0, beta=1.0). For the IUPAC consensus  
349 data, we enabled the processing of ambiguous sites by adding `useAmbiguities="true"` to  
350 the gene tree likelihood priors for all loci in the STACEY XML file. All analyses were run  
351 for 1,000,000,000 MCMC generations or until convergence (ESS values >200), logging  
352 every 20,000 generations. Convergence was assessed using Tracer v1.6 (Rambaut et al.  
353 2013). We then summarized the posterior tree distribution into one maximum clade  
354 credibility tree with TreeAnnotator v2.4.4, discarding the first 10% of trees as burn-in.

355 For the simulated data, we analyzed the posterior species tree distributions of each  
356 analysis with the program SpeciesDelimitationAnalyser (part of the STACEY  
357 distribution). This program produces a similarity matrix that contains the posterior  
358 probabilities of belonging to the same cluster for each pair of sequences. This analysis was  
359 run with a collapseHeight value of 1e-5 (identical to the collapseHeight used in the  
360 STACEY analysis), while discarding the first 10% of trees as burn-in.

361 *SNP-based tree estimation.*— To estimate the species tree phylogeny from the extracted  
362 SNP data, we analyzed the empirical and simulated SNP data in SNAPP. We did not  
363 apply prior clade assignments to the samples in the SNP alignment (each sample was  
364 assigned as its own taxon), we set coalescent rate and mutation rates to be estimated based  
365 on the input data, and we chose a Yule species tree model with default settings ( $\lambda =$   
366 0.00765). We ran the analysis for 10,000,000 generations, sampling trees and other  
367 parameters from the posterior every 1,000 generations. Unlike STACEY, SNAPP assumes  
368 correct assignments of all sequences to coalescent species. Using the simulated SNP data,  
369 we therefore tested how our approach of assigning every individual as its own coalescent  
370 species affects the resulting phylogenetic inference. We did so by running a separate  
371 analysis for both simulated SNP datasets (complete and reduced) with correct species  
372 assignments (assignments as in Fig. 6g).

373

## RESULTS

374

### *Mitochondrial Tree (BEAST)*

375 The BEAST analysis of complete mitochondrial genomes (see online Appendix 1) produced  
376 a fully resolved topology (Fig. 3). All nodes were supported by 100% Bayesian posterior  
377 probability (PP). We inferred the divergence between the two lineages *T. pyra* and *T. pella*  
378 at 2.36 Ma, with 95% of the highest posterior density (HPD) ranging between 1.96 and  
379 2.78 Ma. The tree also shows a separation of two distinct lineages within *T. pyra* at 0.68  
380 Ma (95% HPD: 0.54 - 0.84 Ma), dividing the samples of this morphospecies into a northern  
381 and a southern clade, separated by the Amazon River (Fig. 1). A similar, yet slightly more  
382 recent split can be seen within *T. pella*. We inferred the age of this split to 0.39 Ma (95%  
383 HPD: 0.30 - 0.48 Ma), revealing the same pattern of one northern and one southern clade  
384 with the exception of sample 7; this sample from the southern bank of the Amazon River  
385 delta is placed together with the samples derived from localities north of the Amazon  
386 (samples 5 and 6). Below, we refer to those individuals sampled north of the Amazon River  
387 as “northern” and to those sampled south of the Amazon as “southern”.

388

### *UCE Summary Statistics*

389 *Alignment statistics.*— We use the term “polymorphic sites” for those positions within a  
390 MSA alignment of a given locus where we find at least two different states at a particular  
391 position among the sequences for all samples. This does not require a particular individual  
392 being heterozygous for the given position, since we do not search for SNPs on a per sample  
393 basis but rather for SNPs within the genus *Topaza* (for the following statistics we are  
394 excluding the outgroup). In this manner, we found that the empirical UCE contig sequence

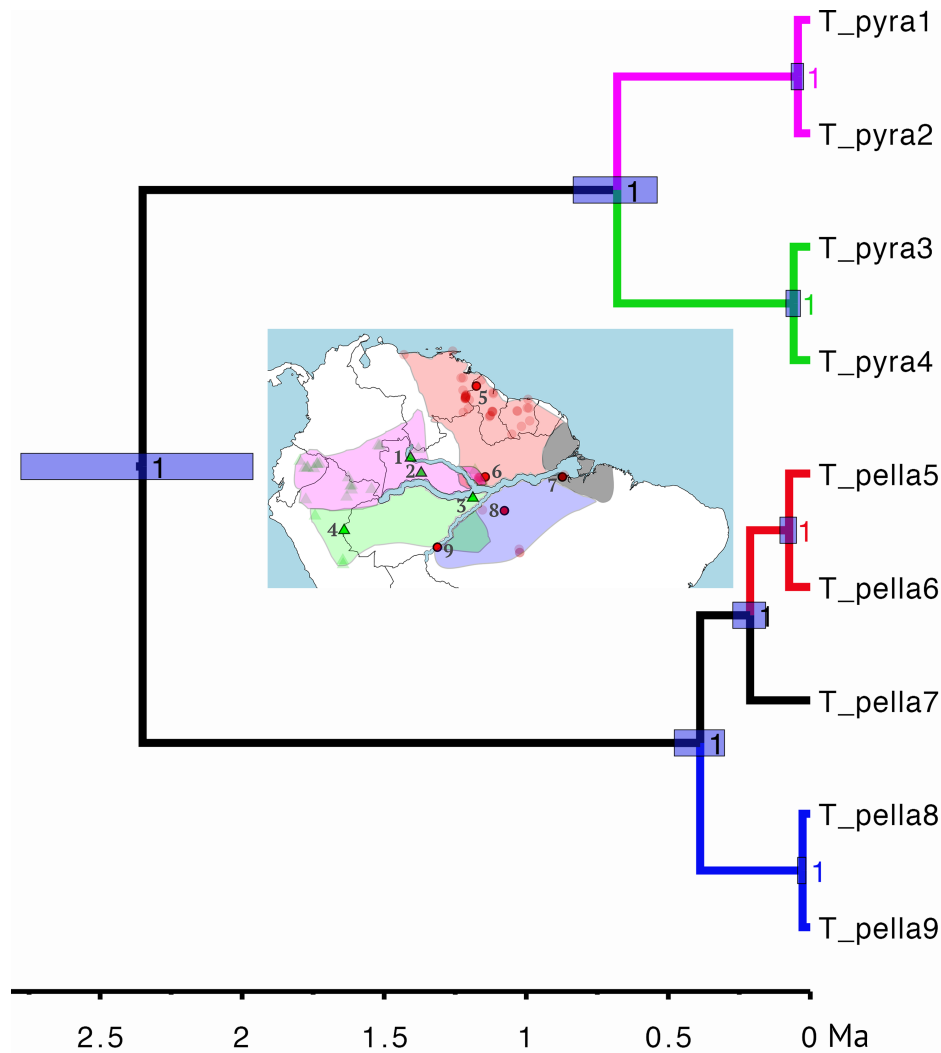

Figure 3: Phylogeny estimated from complete mitochondrial genomes in BEAST. Node support values represent PP. The blue bars at nodes represent the 95% HPD of divergence times. Scale axis shows time units in millions of years. The map in the center shows the potential ranges of the clades that are found in the mitochondrial tree (color-coded). The ranges are based on the BirdLife distribution ranges (Fig. 1) and have been expanded in order to accommodate all *Topaza* occurrence data.

395 alignments had an average of 2.8 polymorphic sites per locus and an average alignment  
396 length of 870 bp. In contrast, phasing the empirical UCE data to create allele alignments  
397 led to 4.5 polymorphic sites per locus and an average alignment length of 848 bp,  
398 representing a 60% increase in polymorphic sites per locus. This increase of polymorphic  
399 sites was attributable to the fact that many variants get lost during contig assembly,

400 because ABYSS and other tested contig assemblers, namely Trinity and Velvet, often  
401 eliminate one of the two variants at heterozygous positions (see below). The reduced  
402 length of the allele alignments in comparison to the contig alignments was due to  
403 conservative alignment clipping thresholds implemented in PHYLUCE, which clip  
404 alignment ends if less than 50% of sequences are present. Because the allele phasing  
405 algorithm divides the FASTQ reads into two allele bins and because a nucleotide is only  
406 called if it is supported by at least three high-quality FASTQ reads, we lost some of the  
407 nucleotide calls at areas of low read coverage (mostly at the ends of a locus) when  
408 comparing the allele sequences to the contig sequences. More information about the  
409 distribution of lengths and variable sites within the empirical UCE data can be found in  
410 the Supplementary Figs. S1 and S2 available on Dryad.

411         The simulated contig MSAs had an average of 3.2 polymorphic sites per locus, after  
412 excluding the outgroup. The simulated allele MSAs, on the other hand, contained an  
413 average of 5.4 polymorphic sites (69% increase). An overview of parsimony informative  
414 sites, variable sites and length of each alignment (simulated and empirical data) can be  
415 found in Supplementary Table S2 available on Dryad.

416 *ABYSS does not detect heterozygous sites.*— ABYSS occasionally produces contig  
417 sequences containing IUPAC ambiguity codes, which suggests that these sites may  
418 accurately represent heterozygosity in the read data and that assembly with ABYSS may  
419 be preferred to using other assembly algorithms because the resulting contigs contain more  
420 information. To validate this assumption, we checked one randomly selected sample  
421 (sample 5, *T. pella*) to see if degenerate sites in the contig sequences produced by ABYSS  
422 were heterozygous in the phased allele sequences. The results are striking, because there  
423 are zero heterozygous sites within the allele sequences for sample 5 that were correctly  
424 coded as IUPAC ambiguity codes in the ABYSS contigs (e.g. Fig 4a). Moreover, our

425 phasing approach revealed 343 heterozygous UCE loci with a total of 728 SNPs in sample 5  
426 while contig sequences from the ABYSS *de novo* assembly only contained IUPAC  
427 ambiguity codes (degenerate bases) at 26 UCE loci. For all other loci, ABYSS output  
428 homozygous contig sequences, indicated by the fact that all are free of ambiguity codes.  
429 Within the 26 loci containing IUPAC ambiguity codes, ABYSS introduced 473 degenerate  
430 bases, most of which constitute blocks of N's. Effectively, all of these ambiguous positions  
431 are in places of extremely low FASTQ read coverage (<2 reads per haplotype), with the  
432 exception of six positions that are covered by greater than two reads per haplotype.  
433 However, even those six positions do not represent true heterozygous sites within sample 5,  
434 which becomes apparent when comparing aligned FASTQ reads at those loci with the  
435 phased allele sequences with the contig sequences produced by ABYSS (e.g. Fig. 4b).

### 436 *MSC Results of Empirical UCE Data*

437 The MSC species tree results for all tested processing schemes of the empirical UCE data  
438 (contig sequences, allele sequences, IUPAC consensus sequences, chimeric allele sequences  
439 and SNPs) converge on similar topologies for relationships among *T. pella*, yet the  
440 relationships inferred among *T. pyra* are less clear (Fig. 5 and Supplementary Fig. S3  
441 available on Dryad). All analyses strongly support the monophyly of both *T. pyra* and *T.*  
442 *pella* with 100% PP. In all MSC analyses, we also see strongly supported genetic structure  
443 within *T. pella* ( $\geq 97\%$  PP), separating the northern samples (5 and 6) from the southern  
444 ones (7, 8 and 9). Additionally, within the shallow southern *T. pella* clade, all datasets,  
445 with exception of the IUPAC consensus data (Fig. 5c), strongly support a genetic  
446 distinction ( $\geq 99\%$  PP) between sample 7 from the Amazon River delta and the other  
447 southern *T. pella* samples (8 and 9). The deep split between northern and southern  
448 samples within *T. pyra* on the other hand, which we find in the mitochondrial tree (Fig.  
449 3), is not well-supported by the multilocus MSC analyses. However, the analysis of the

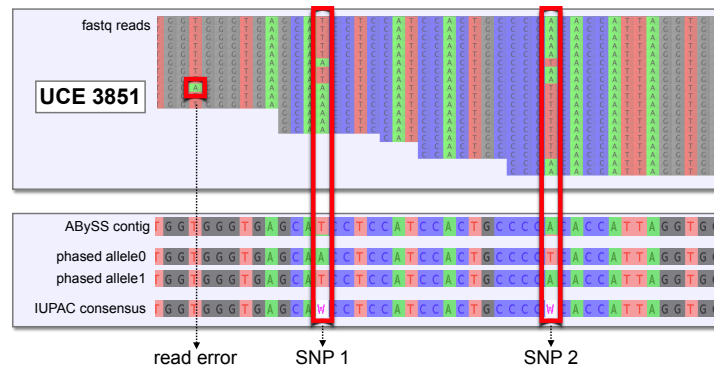

(a) Heterozygous position picked up by allele phasing

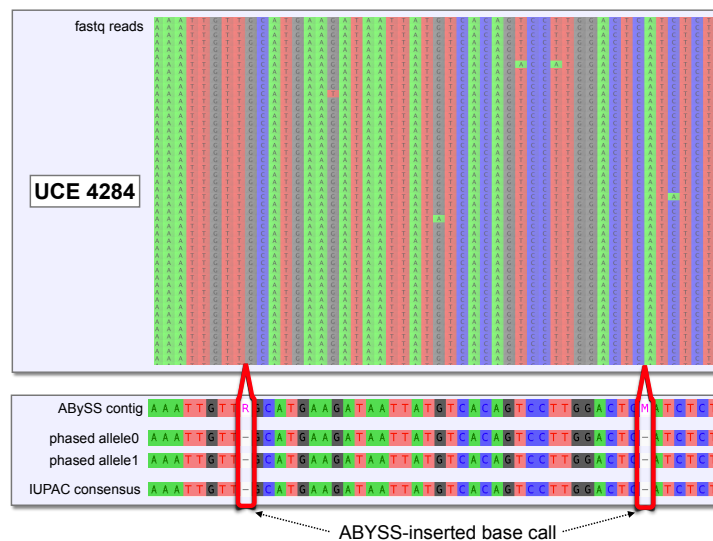

(b) Erroneous insertion of IUPAC ambiguity by ABYSS

Figure 4: Detection of heterozygous sites in FASTQ reads. The figure shows two UCE loci for sample 5 (*T. pella*). Displayed in both cases are the FASTQ reads, the ABYSS contig sequence, the two phased allele sequences and the correct IUPAC consensus sequence generated from our phased allele sequences. (a) An example of true heterozygous sites, which are correctly represented in the phased allele sequences but are not coded as IUPAC ambiguities in resulting ABYSS contig. Instead ABYSS makes a majority call for this position, thereby masking the heterozygous site by eliminating one of the two variants. This is the case for all heterozygous sites that were picked up by the allele sequences in our data. (b) An example of a UCE locus that contains IUPAC ambiguity codes in the ABYSS contig sequence. Contrary to expectations, the ambiguity calls at these positions are not supported by the FASTQ reads and appear to be inserted by ABYSS at random positions. Our phased allele sequences, on the other hand, represent the FASTQ reads correctly and do not call this position as heterozygous. We observed this same pattern across all 26 loci in our data with ABYSS-inserted IUPAC ambiguity codes.

450 allele dataset returns a phylogenetic signal, possibly tracking a genetic divergence between  
451 these two clades, but their monophyly is not very strongly supported (Fig. 5b).

## 452 *MSC Results of Simulated Data*

453 *Species tree topology.*— For the simulated data, we analyzed six different datasets under  
454 the MSC model: contig sequence MSAs (n=150, STACEY), allele sequence MSAs (n=150,  
455 STACEY), IUPAC consensus MSAs (n=150, STACEY), chimeric allele MSAs (n=150,  
456 STACEY), reduced SNP data (n=150, SNAPP), and the complete SNP dataset (n=820,  
457 SNAPP). All resulting species trees (Figs. 6a to 6f) correctly return the topology of the  
458 species tree that was used to simulate the data (Fig. 6g). All central nodes in the species  
459 trees are supported by  $\geq 90\%$  PP in all analyses, with the exception of the species tree  
460 resulting from the reduced SNP dataset, which shows very weak support for two nodes and  
461 has a large uncertainty interval around the root-height (Fig. 6e). However, these  
462 shortcomings disappeared when we added more (unlinked) SNPs to the dataset (Fig. 6f).  
463 The full SNP dataset (n=820) produced the correct species tree topology with high node  
464 support consistently throughout ten independently simulated datasets (Supplementary Fig.  
465 S4 available on Dryad). The SNAPP species tree topology appeared to be unaffected by  
466 the chosen clade assignment model; while we allowed every sequence to be its own taxon in  
467 Figs. 6e and 6f, we also applied the correct species assignment (Fig. 6g) in two additional  
468 analyses (reduced and complete SNP data) that returned the same tree topology  
469 (Supplementary Figs. S5 and S6 available on Dryad).

470 *Species delimitation.*— Although the inferred species tree topology was consistent among  
471 all four sequence-based MSC analyses (Figs. 6a to 6d), the inferred node heights varied  
472 considerably between the species trees resulting from the different data processing schemes.  
473 For the contig sequence data (Fig. 6a) and the chimeric allele data (Fig. 6d), the node

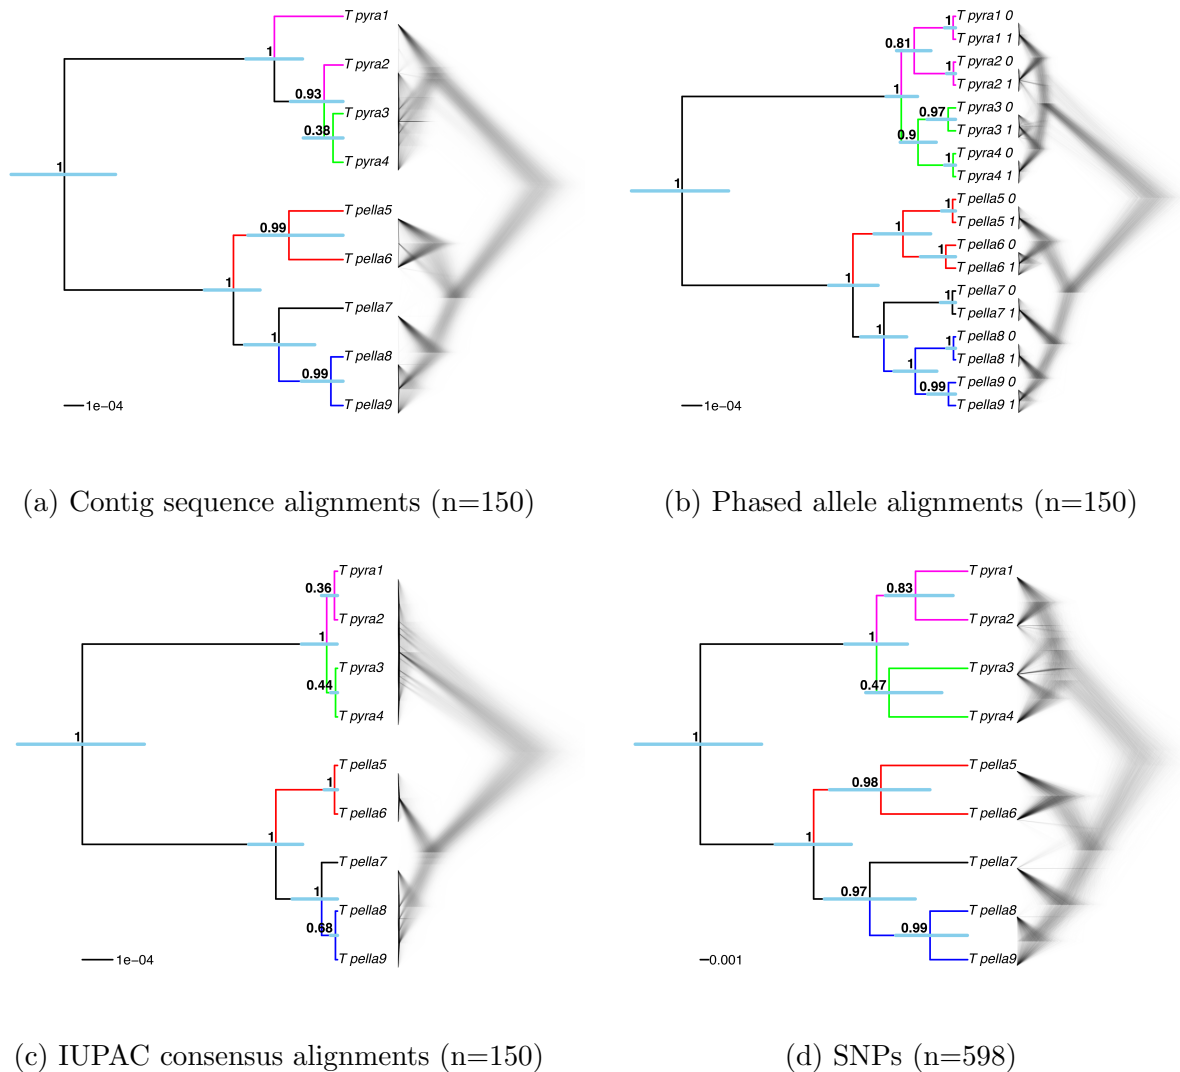

Figure 5: MSC species trees for the empirical *Topaza* data, based on four different data types used in this study: contig sequence MSAs, phased allele sequence MSAs, IUPAC consensus sequence MSAs and SNP data. (a) STACEY species tree from UCE contig alignments (n=150), (b) STACEY species tree from UCE allele alignments (n=150), (c) STACEY species tree from UCE IUPAC consensus alignments (n=150) and (d) SNAPP species tree from SNP data (1 SNP per locus if present, n=598). Shown are the maximum clade credibility tree (node values = PP, error-bars = 95% HPD of divergence times) and a plot of the complete posterior species tree distribution (excluding burn-in).



474 heights within the five simulated species (D,E,X,Y,Z) were too high, which led to an  
475 overestimation of the number of coalescent species in the dataset (see similarity matrices).  
476 Conversely, the phased allele data (Fig. 6b) and the IUPAC consensus data (Fig. 6c)  
477 correctly delimited the five coalescent species from the simulation input tree (Fig. 6g). The  
478 STACEY results showed the same pattern in all ten simulation replicates (Supplementary  
479 Fig. S7 available on Dryad).

480 *Accuracy of divergence time estimation.*— For all four sequence-based analyses (Figs. 6a  
481 to 6d) the average substitution rate across all loci was set to ‘1’. Under these settings, we  
482 expected the absolute values of the sequence-based analyses to return the node height  
483 values of the simulation input tree, which used substitution rates scaled in the same  
484 manner. The phased allele MSAs produced the most accurate estimation of divergence  
485 times out of all tested datasets (see proximity of estimates to simulation input value,  
486 represented by green line in Fig. 7). This was the case for all nodes in the species tree,  
487 namely (D,E), (Y,Z), (X,(Y,Z)), and ((D,E)(X,(Y,Z))). The divergence time estimates  
488 resulting from the phased allele data accurately recovered the true values and did not show  
489 any bias throughout ten simulation replicates (Supplementary Fig. S8 available on Dryad).  
490 This contrasts with the contig MSAs and the chimeric allele MSAs that consistently  
491 overestimated the height of all nodes and the IUPAC consensus MSAs which consistently  
492 underestimated the height of all nodes (Fig. 7, Supplementary Fig. S8).

### 493 *Additional Analyses*

494 We ran additional analyses of the contig and the phased allele MSAs for both the empirical  
495 and simulated data using a summary coalescent approach as implemented in MP-EST (Yu  
496 et al. 2007), which can be found in online Appendix 2 and Supplementary Figs. S9 to S11  
497 (available on Dryad).

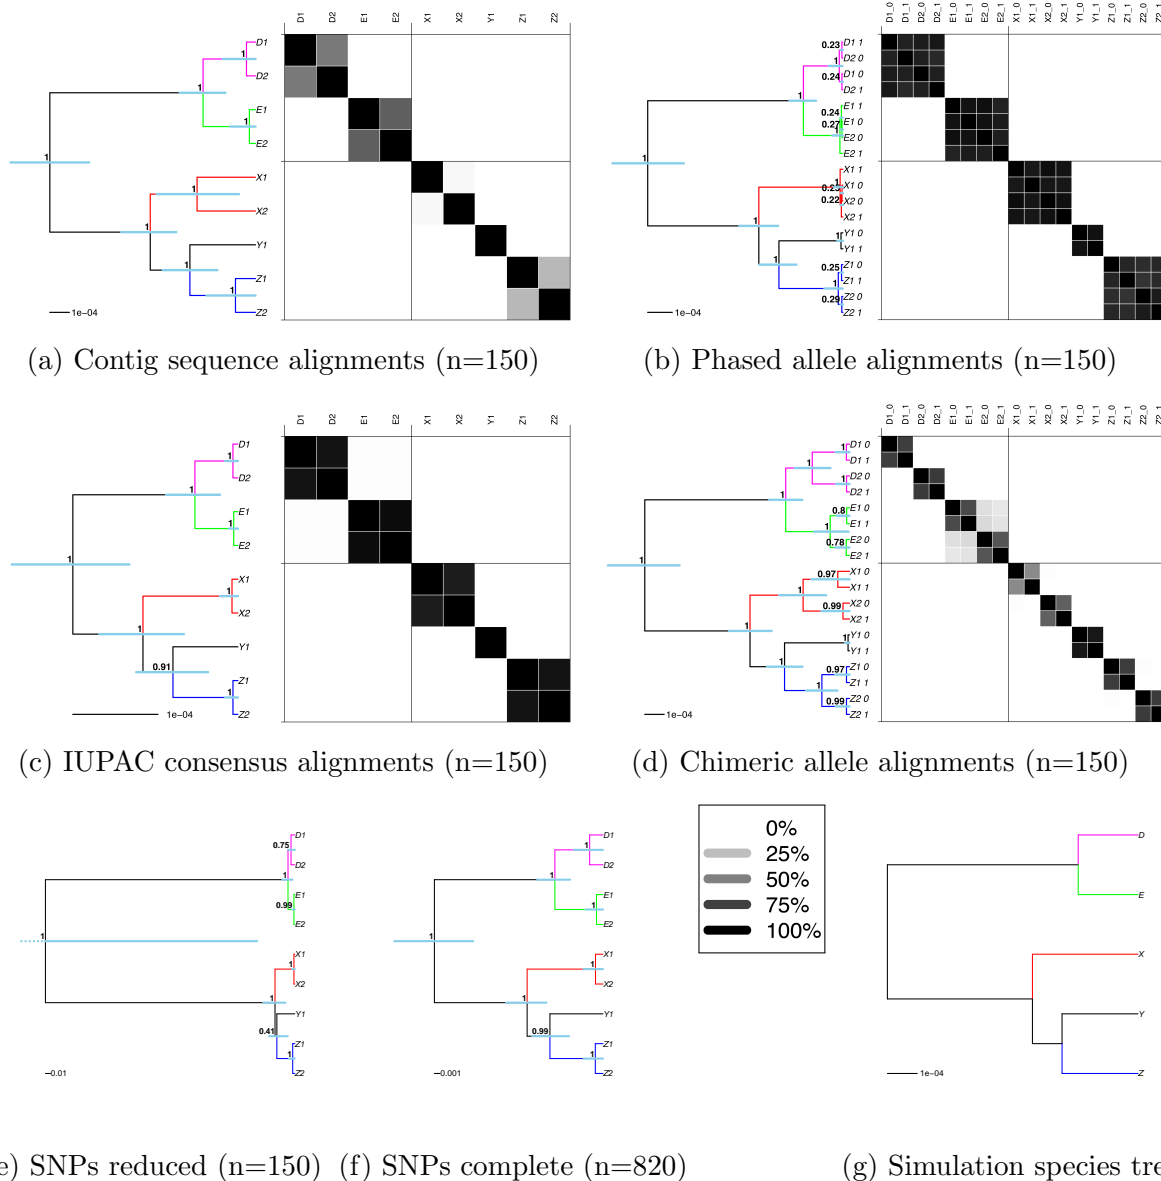

Figure 6: MSC species tree results for different data processing schemes of simulated data. (a) to (d) show the STACEY results of the four different types of MSAs analyzed in this study (see sub-figure captions). Displayed in these panels are the maximum clade credibility trees and the similarity matrices depicting the posterior probability of two samples belonging to the same clade, as calculated with SpeciesDelimitationAnalyser. Dark panels depict a high pairwise similarity, whereas light panels depict low similarity scores (see legend). (e) and (f) show the maximum clade credibility trees resulting from SNAPP for our two SNP datasets, (reduced and complete). (g) shows the species tree under which the sequence data were simulated in this study. Node support values in PP, blue bars representing 95% HPD confidence intervals.

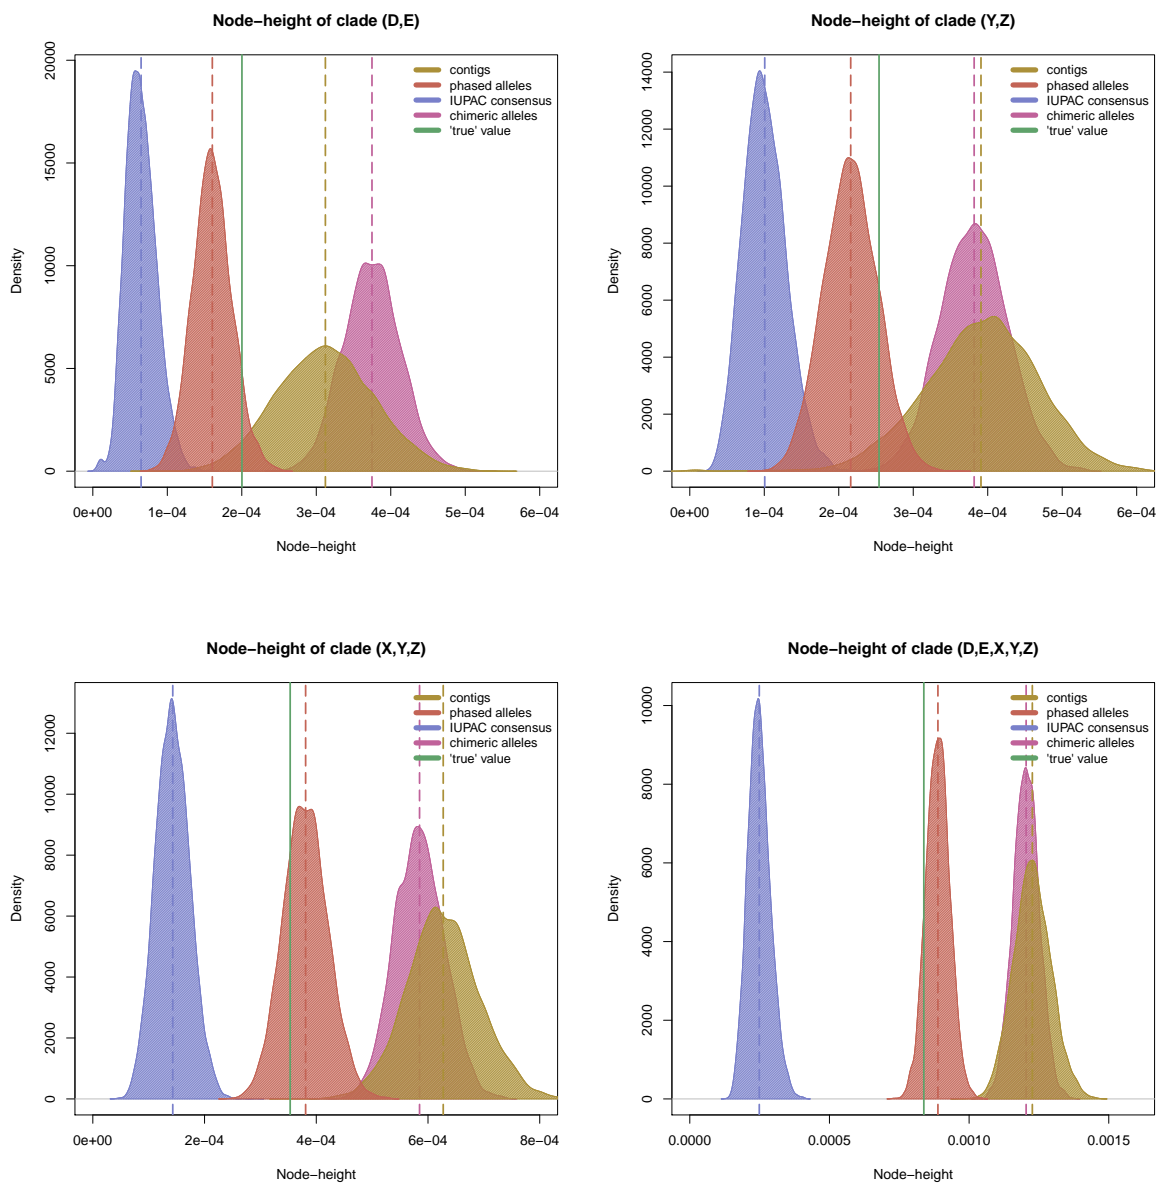

Figure 7: Posterior distributions of divergence times estimated with STACEY. Each sub-figure shows several density plots of node-height estimates for a different node in the STACEY species tree (see sub-figure titles). The four density plots in each sub-figure are approximated from all node height values in the posterior sample (excl. 10% burnin), as estimated by STACEY for the four different data processing schemes tested in this study: contig sequences (yellow), phased allele sequences (red), IUPAC consensus sequences (blue) and chimeric allele sequences (pink). The dotted lines show the means of these posterior distributions. The solid green line shows the true node height value, which is the node height for the respective clade in the input species tree, under which the sequence alignments were simulated.

498

## DISCUSSION

499

### *Allele Phasing is the Preferred Data Processing Scheme*

500 We tested whether phylogenetic inference improves by phasing sequence capture data into  
501 allele sequences, in comparison to the standard workflow of analyzing contig sequences  
502 (Faircloth et al. 2012; McCormack et al. 2012; Smith et al. 2014; Faircloth 2015). The  
503 answer is yes. We find that phased allele data outperform contig sequences in terms of  
504 species delimitation (Fig. 6) and the estimation of divergence times (Fig. 7). Contig  
505 sequence MSAs lead to a consistent overestimation of divergence times (Fig. 7), which in  
506 turn lead to an overestimation of the number of coalescent species in our simulated data  
507 (Fig. 6a). These results support earlier work by Lischer et al. (2014), who concluded that  
508 consensus sequences introduce a bias towards older node heights.

509 Besides the qualitative advantages of using phased allele sequences for phylogenetic  
510 analyses, there are further theoretical arguments for compiling and analyzing allele  
511 sequence MSAs from sequence capture datasets. First, allele sequences represent the  
512 smallest evolutionary unit on which selection and other evolutionary processes act.  
513 Therefore, the coalescent models that underly our phylogenetic methods, including the  
514 MSC model Degnan and Rosenberg (2009), have been developed for allele sequences.  
515 Contig sequences, on the other hand, represent an artificial and possibly chimeric sequence  
516 construct that arises from merging all read variation at a given locus into a single sequence.  
517 This process masks information by eliminating one of the two variants at a heterozygous  
518 site (Fig. 4). This shortcoming of the most common assemblers (e.g. ABYSS, Trinity and  
519 Velvet) is due to the fact that they were designed to assemble haploid sequences and are  
520 not optimized for heterozygous sequences or genomes (Bodily et al. 2015). Second, not  
521 only are allele sequences the more appropriate data type, but phasing sequence capture

522 data also leads to a doubling of the effective sample size, since two sequences are compiled  
523 for a diploid individual, in contrast to the single sequence per individual that is recovered  
524 when taking the contig approach. Our results demonstrate how these sequences can be  
525 treated as independent samples from a population by using the assignment-free  
526 BirthDeathCollapse model as implemented in STACEY. Because STACEY requires no *a*  
527 *priori* assignment of sequences to taxon, this avoids a violation of the MSC that would  
528 occur when analyzing allele sequences as separate taxa in \*BEAST, because \*BEAST  
529 assumes each taxon constitutes a separate coalescent species. Third, sequence capture  
530 datasets such as UCEs are optimal for allele phasing because they contain high read  
531 coverage collected across short genomic intervals that are optimal for read-connectivity  
532 based phasing. The workflow developed in this study is now fully integrated into the  
533 PHYLUCE pipeline, making allele phasing and SNP extraction for sequence capture data  
534 easily available to a broad user group. Given these advantages of allele sequences over  
535 contig sequences and given the easy availability of the processing workflow, we recommend  
536 that allele phasing be considered as a standard practice for future sequence capture studies.

### 537 *Phasing of Heterozygous Sites Matters*

538 Several studies have accounted for heterozygosity by inserting IUPAC ambiguity codes into  
539 their sequences at variable positions (Potts et al. 2014; Schrepf et al. 2016), rather than  
540 phasing SNPs to produce separate allele sequences. Here, we directly compared these two  
541 approaches, and found that the IUPAC consensus sequences performed equally well to the  
542 phased allele sequences for estimating the species tree topology (Fig. 6). However, IUPAC  
543 consensus sequence data led to a consistent underestimation of the divergence times of all  
544 nodes in the species tree (Fig. 7). Our results contrast with those of (Lischer et al. 2014),  
545 who reported an overestimation of divergence times for alignments containing IUPAC  
546 ambiguity codes. The differences between our results may simply be caused by the different

547 tree inference programs that we used. Lischer et al. (2014) applied a Neighbour Joining  
548 (NJ) tree algorithm as implemented in the software PHYLIP (Felsenstein 2005) that treats  
549 two sequences containing the same ambiguity codes as identical. In effect, the approach  
550 used by Lischer et al. (2014) did not truly investigate the effect of IUPAC ambiguity codes  
551 on phylogenetic estimates but rather the effect of removing heterozygous sites. Our  
552 approach of analyzing IUPAC consensus sequences under the MSC in STACEY, on the  
553 other hand, properly integrates these IUPAC ambiguity codes into the calculation of the  
554 gene tree likelihoods. Thus, we conclude that IUPAC ambiguity codes introduce a bias  
555 towards younger divergence times, even when properly integrating IUPAC ambiguities into  
556 the phylogenetic model. The underlying cause of this discrepancy should be further  
557 investigated in future studies.

558 We also tested whether the improved performance of phased allele sequence data  
559 may merely be an effect of doubling the number of sequences in the MSAs, since we are  
560 producing two allele sequences for each individual rather than one contig sequence.  
561 Therefore, we generated a dataset of chimeric allele sequences that contains the same  
562 number of sequences as the phased allele data, but we randomly shuffled all heterozygous  
563 positions within an individual between the two allele sequences. As with the contig data,  
564 the chimeric allele data led to an overestimation of the number of coalescent species (Fig.  
565 6d) and to a biased estimation towards older divergence times (Fig. 7). The fact that  
566 contig sequences and chimeric allele sequences produce very similar results in our analyses  
567 is not surprising, because contigs, themselves, represent chimeric consensus sequences of  
568 the variation found at a locus within an individual. The similarity of the results between  
569 contig MSAs and chimeric allele MSAs also shows that the number of sequences being  
570 analyzed does not affect our topology, species delimitation and divergence time estimates  
571 (Figs. 6 and 7).

572 Based on these findings, we conclude that proper phasing of heterozygous positions

573 is clearly preferable to the alternative of coding heterozygous sites as IUPAC ambiguity  
574 codes, particularly when the estimation of divergence times is of interest. Further, allele  
575 sequences are theoretically more appropriate input for coalescent models and should be the  
576 preferred data type input to these models. The scalability of this approach to larger sample  
577 sizes and the applicability of our results to studies of older divergences are questions that  
578 should be investigated in future studies.

### 579 *UCEs as source for SNP data*

580 Due to the size (number of loci) of many sequence capture datasets, it is often unfeasible to  
581 analyze all MSAs jointly in one MSC analysis (Smith et al. 2014; Manthey et al. 2016)  
582 because of computational limitations. For all sequence-based MSC analyses in this study,  
583 we reduced the UCE dataset from 820 loci to 150 loci in order to reach convergence of the  
584 MCMC within a reasonable time frame (three to four days, single core on a Mac Pro, Late  
585 2013, 3.5 GHz 6-Core Intel Xeon E5 processor). However, a viable approach to data  
586 reduction, while keeping the multilocus information of all loci, is to analyze only a single  
587 polymorphic position per MSA using SNAPP (Bryant et al. 2012). In our study, this  
588 approach produces the correct species tree topology and also estimated the relative  
589 node-heights correctly (Fig. 6f). However, SNAPP can only estimate relative and not  
590 absolute values for divergence times (Bryant et al. 2012), in contrast to the sequence-based  
591 analyses Figs. 6a to 6d that deliver absolute divergence time estimates.

592 Sequence capture datasets such as UCEs provide a suitable data source to extract  
593 both full sequence alignments and SNP datasets of sufficient size for robust species tree  
594 estimation. Even though sequence capture data are not commonly thought of as a source  
595 of SNPs, they can, in many cases, be preferable to other sequencing techniques, such as  
596 RAD sequencing, for producing SNP data. This is because sequence capture data yields a  
597 sizable, complete SNP matrix (SNPs recovered for all individuals), due to targeted

598 sequence enrichment. In this study, the complete matrix of unlinked SNPs in the empirical  
599 data consisted of 598 positions, which were present and sufficiently supported (>three  
600 high-quality reads per haplotype) in all taxa. Particularly when evolutionary distances  
601 between individuals are large, RAD sequencing and other restriction-site based sequencing  
602 techniques are not expected to yield many loci shared by all individuals, whereas UCE  
603 data are less sensitive to large evolutionary distances (Harvey et al. 2016). In these cases,  
604 the size of the complete SNP matrix resulting from UCE data can exceed that resulting  
605 from RAD sequencing. Additionally, UCE data provide hundreds to thousands of full  
606 sequence MSAs as well as the complete mitochondrial genome as a byproduct of the  
607 sequence enrichment. The mitochondrial genome provides an excellent marker for  
608 estimating absolute divergence times (Fig. 3), based on substitution rates of mitochondrial  
609 markers which are known for birds (Lerner et al. 2011), and thus remains a valuable source  
610 of phylogenetic information.

611 In this study, we present and make available a new SNP calling pipeline for  
612 sequence capture data. In contrast to other SNP calling software such as GATK (McKenna  
613 et al. 2010) that uses BAM files, our approach uses full sequence MSAs as input (see Fig.  
614 2), in order to identify and extract sites in the alignments that show variation between any  
615 user-defined group of sequences. Although our SNP calling script can be applied to any  
616 type of sequence alignments (i.e. allele or contig sequence alignments), we recommend  
617 using SNPs extracted from phased allele alignments for phylogenetic analyses, because they  
618 represent the true heterozygous information. The user can choose whether or not to allow  
619 missing data or ambiguities in the extracted positions, whether to extract them in binary  
620 format (as e.g. required by SNAPP) or as nucleotides, and if only a single SNP per locus  
621 or all SNPs should be extracted. Thus our SNP calling mechanism is an easy, open-source  
622 and straightforward tool to derive SNP data from any set of multiple sequence alignments.



623

## *Phylogenetic relationships in Topaza*

624 *One or two species?*.— Our results show a separation of two lineages within the genus  
625 *Topaza* that is dated at ca. 2.4 Ma in the mitochondrial tree (Fig. 3). These lineages are  
626 consistent with the previously described morphospecies *T. pyra* (Gould, 1846) and *T. pella*  
627 (Linnaeus, 1758) that are generally accepted in the ornithological community (Hu et al.  
628 2000; del Hoyo et al. 2016a). However, the species status of *T. pyra* has been challenged by  
629 some authors (Ornés-Schmitz and Schuchmann 2011; Schuchmann 1999). These authors  
630 concluded that *Topaza* is a monotypic genus with *T. pyra* being a subspecies of *T. pella*,  
631 which they refer to as *T. pella pyra*. Their findings are based on the analyses of plumage  
632 coloration, in which they found an “east-west clinal trend of characters” (Ornés-Schmitz  
633 and Schuchmann 2011). In contrast, we do not find such an east-west clinal trend in the  
634 genetic data. Instead, *T. pyra* is consistently supported as a separate lineage across all  
635 analyses, lending no support for the conspecificity of these two taxa (Figs. 3 and 5).

636 One aim of this study was to evaluate the genetic structure within these two  
637 morphospecies, *T. pyra* and *T. pella*. The mitochondrial tree shows two divergent clades  
638 within *T. pyra* (Fig. 3), but these clades are not strongly supported by the UCE data (Fig.  
639 5), even though the allele sequence data are picking up a signal that possibly indicates two  
640 clades are in the process of diversifying (Fig. 5b). For *T. pella*, on the other hand, we  
641 consistently find the same clades throughout all multilocus MSC analyses (Fig. 5), leading  
642 us to distinguish between the following populations that are congruent with previous  
643 morphological subspecies descriptions:

644 *Northern T. pella population: T. pella pella.*— For the mitochondrial tree and all MSC  
645 species trees, we find the northern *T. pella* samples 5 and 6 to be sister taxa with high  
646 support values (98-100% PP, Figs. 3 and 5). Particularly in the mitochondrial tree (Fig.  
647 3), these two samples appear as close sister taxa, separated by only very short terminal

648 branches. Their close position in the mitochondrial tree shows that, even though  
649 geographically far apart, samples 5 and 6 share a relatively recent MRCA in the  
650 mitochondrial genealogy, indicating some rather recent gene flow. The sampling locality of  
651 sample 5 is within the range of the subspecies *T. pella pella*, which extends mainly across  
652 the Guiana shield (Peters 1945; Schuchmann 1999; Hu et al. 2000; Ornés-Schmitz and  
653 Schuchmann 2011). Given the sampling location of genetically related sample 6, which also  
654 has been morphologically identified as *T. pella pella* (Table 1), we propose that the  
655 distribution range of *T. pella pella* extends from the Guiana shield all the way south to the  
656 northern Amazon River bank (see map in Fig. 3).

657 *Southern T. pella population: T. pella microrhyncha.*— In the same manner as for the  
658 northern population *T. pella pella*, we also consistently find the southern *T. pella* samples  
659 8 and 9 to be sister taxa (99-100% PP, Figs. 3 and 5). The sampling locations of these two  
660 samples are included in the distribution range of the previously recognized subspecies *T.*  
661 *pella microrhyncha*, extending from the southern bank of the Amazon River as far South as  
662 Porto Velho (Brazil) at the Madeira River, close to the border to Bolivia (Peters 1945;  
663 Schuchmann 1999; Ornés-Schmitz and Schuchmann 2011). This southernmost boundary of  
664 *T. pella microrhyncha* is not accepted by Hu et al. (2000), who instead conclude that this  
665 southernmost population belongs to *T. pella pella*. In contrast to the findings by Hu et al.,  
666 our genetic data clearly support the southernmost sample 9 belonging to the same  
667 population as sample 8, which was morphologically identified as *T. pella microrhyncha*.  
668 This leads us to propose that the distribution range of *T. pella microrhyncha* is in fact as  
669 shown in Fig. 3, in agreement with the findings by Peters (1945), Schuchmann (1999), and  
670 Ornés-Schmitz and Schuchmann (2011).

671 *Estuary region of Amazon River: T. pella smaragdula.*— Our results show a mixed signal  
672 concerning the phylogenetic placement of sample 7, which was collected from the southern

673 estuary region of the Amazon River and morphologically identified as *T. pella smaragdula*.  
674 The sampling locality also falls into the range of the subspecies *T. pella smaragdula* (Peters  
675 1945; Hu et al. 2000; Ornés-Schmitz and Schuchmann 2011), with a distribution including  
676 the Amazon River estuary and extending north along the coast to French Guiana. All  
677 MSC analyses of the UCE sequence and SNP data place sample 7 with high confidence  
678 (97-100% PP) as sister to the southern clade *T. pella microrhyncha* (Fig. 5), whereas in  
679 the mitochondrial phylogeny this sample is placed as sister to *T. pella pella* in the North.

680         The discordance between a gene tree and the species tree in a scenario such as this  
681 could be the effect of incomplete lineage sorting, which is most likely if the species or clades  
682 in question have diverged rather recently and if population sizes are large. Given that the  
683 divergence between *T. pella pella* and *T. pella microrhyncha* appears to be considerably  
684 deep based on the multilocus data (crown height of *T. pella*) see Fig. 5) and given that  
685 mitochondria are generally considered to have only 25% of the population size of nuclear  
686 loci, it is rather unlikely that the position of sample 7 in the mitochondrial tree is the result  
687 of incomplete lineage sorting in this case. It seems more likely that the separate position of  
688 sample 7 in the mitochondrial tree is the result of introgression of the mitochondrial  
689 genome from *T. pella pella* into the gene pool of *T. pella smaragdula*. However, a denser  
690 taxon sampling would be necessary to further evaluate the evolutionary history of this  
691 particular population. The case of sample 7 highlights that the mitochondrial tree presents  
692 a single gene tree phylogeny that only shows one of many genealogies and therefore must  
693 not be equated with a species tree phylogeny. Hence it is important to generate multilocus  
694 data for an informed inference of the species tree phylogeny.

695 *Summarizing biogeographic remarks.*— The presence of genetically similar individuals  
696 sampled at great geographic distances (e.g. samples 5 and 6) suggests that *Topaza*  
697 hummingbirds maintain high levels of gene flow across vast distances of rainforest habitat.

698 At the same time, we find indicators of phylogenetic structure within species,  
699 distinguishing samples that are separated by only a small geographic distance (see e.g.  
700 samples 6 and 8). These samples are however separated by the Amazon River, which has  
701 been found to constitute a dispersal barrier for various species of birds and many other  
702 animals (Remsen and Parker 1983; Clair 2003; Hayes and Sewlal 2004; Moore et al. 2008;  
703 Fernandes et al. 2012; Ribas et al. 2012; Thom and Aleixo 2015). Even though some  
704 hummingbird species are known to disperse across large distances (Wyman et al. 2004;  
705 Russell et al. 1994), the Amazon River and its associated habitats (such as seasonally  
706 flooded forests) may be part of a complex network of factors that inhibit gene flow among  
707 populations of *Topaza* hummingbirds.

708

## CONCLUSIONS

709 In this study, we demonstrate that properly phasing allele sequences produces the most  
710 suitable dataset for phylogenetic analyses, particularly when these allele sequences are  
711 treated as independent sequences under the MSC. Contig sequences, on the other hand,  
712 which are commonly used for phylogenetic inference, lead to biases in the estimation of  
713 divergence times and may cause problems for certain types of phylogenetic analyses.  
714 Additionally, phased allele sequences provide a useful template for the extraction of SNPs,  
715 and we argue that sequence capture data can provide sizable SNP datasets that can be also  
716 used for phylogenetic analyses. Our empirical results suggest the separation of two species  
717 within the genus *Topaza*, and we further find genetic structure within both of these species,  
718 justifying the definition of separate subspecies. Based on our empirical and simulated  
719 results, we conclude that allele phasing should be considered as one “best practice” for  
720 processing sequence capture data, although the sample-size, time, and analytical  
721 limitations of this approach have not been well-established.

## SUPPLEMENTARY MATERIAL

722

723 Supplemental Figs. S1-S11, Supplemental Tables S1 and S2, online Appendices 1 and 2  
724 and all scripts, data and setup-files relevant to analyses and figures in the manuscript are  
725 available from the Dryad Digital Repository:

## AVAILABILITY

726

727 We integrated all scripts and documentation necessary for phasing and SNP extraction as  
728 open-source into the PHYLUCE pipeline  
729 (<http://https://github.com/faircloth-lab/phyluce/blob/working/bin/snps/>). All  
730 data processing and analyses steps executed on the data are stored in bash-scripts on our  
731 project GitHub page at [https://github.com/tobiashofmann88/topaza\\_uce](https://github.com/tobiashofmann88/topaza_uce). We further  
732 provide a documented workflow of processing the raw reads into UCE contig alignments at  
733 <https://github.com/tobiashofmann88/UCE-data-management/wiki>.

## ACKNOWLEDGMENTS

734

735 We wish to thank all those ornithologists who have dedicated their time to collecting  
736 samples in Amazonia; museum curators for providing us with samples for this study;  
737 Brazilian authorities for issuing the permits needed for this work; our lab engineer Anna  
738 Ansebo for laboratory assistance; Alexander Zizka for assistance in creating the sampling  
739 and range maps; HBW Alive for providing the *Topaza* illustrations; and colleagues at our  
740 labs for discussions and feedback. Computational analyses were performed on the  
741 bioinformatics computer cluster Albiorix at the Department of Biological and  
742 Environmental Sciences, University of Gothenburg.

743

## FUNDING

744 This work was funded by the Swedish Research Council to A. Antonelli (B0569601) and B.  
745 Oxelman (2012-3917); the CNPq (grants 310593/2009-3; ‘INCT em Biodiversidade e Uso  
746 da Terra da Amazônia’ 574008/2008-0; 563236/2010-8; and 471342/2011-4), FAPESPA  
747 (ICAAF 023/2011), and NSF-FAPESP (grant 1241066 - Dimensions US-BIOTA-São Paulo:  
748 Assembly and evolution of the Amazonian biota and its environment: an integrated  
749 approach) to A. Aleixo; the European Research Council under the European Union’s  
750 Seventh Framework Programme (FP/2007-2013, ERC Grant Agreement n. 331024), the  
751 Swedish Foundation for Strategic Research and a Wallenberg Academy Fellowship to A.  
752 Antonelli.

753

\*

## 754 References

- 755 Bodily, P. M., M. Fujimoto, C. Ortega, N. Okuda, J. C. Price, M. J. Clement, and Q. Snell.  
756 2015. Heterozygous genome assembly via binary classification of homologous sequence.  
757 BMC Bioinformatics 16:S5.
- 758 Bolger, A. M., M. Lohse, and B. Usadel. 2014. Trimmomatic: a flexible trimmer for  
759 Illumina sequence data. Bioinformatics 30:2114–20.
- 760 Bouckaert, R., J. Heled, D. Kühnert, T. Vaughan, C.-H. Wu, D. Xie, M. A. Suchard,  
761 A. Rambaut, and A. J. Drummond. 2014. BEAST 2: a software platform for Bayesian  
762 evolutionary analysis. PLoS Computational Biology 10:e1003537.
- 763 Bryant, D., R. Bouckaert, J. Felsenstein, N. A. Rosenberg, and A. RoyChoudhury. 2012.  
764 Inferring species trees directly from biallelic genetic markers: bypassing gene trees in a  
765 full coalescent analysis. Molecular Biology and Evolution 29:1917–32.

- 766 Clair, C. C. S. 2003. Comparative permeability of roads, rivers, and meadows to songbirds  
767 in Banff national park. *Conservation Biology* 17:1151–1160.
- 768 Degnan, J. H. and N. a. Rosenberg. 2009. Gene tree discordance, phylogenetic inference  
769 and the multispecies coalescent. *Trends in Ecology and Evolution* 24:332–340.
- 770 del Hoyo, J., N. Collar, G. Kirwan, and P. Boesman. 2016a. Fiery Topaz (*Topaza pyra*). *in*  
771 *Handbook of the Birds of the World Alive* (J. del Hoyo, A. Elliott, J. Sargatal,  
772 D. Christie, and E. de Juana, eds.). Lynx Edicions, Barcelona, Spain.
- 773 del Hoyo, J., A. Elliott, J. Sargatal, D. Christie, and E. de Juana. 2016b. *Handbook of the*  
774 *Birds of the World Alive*. Lynx Edicions, Barcelona, Spain.
- 775 Drummond, A. J., M. A. Suchard, D. Xie, and A. Rambaut. 2012. Bayesian phylogenetics  
776 with BEAUti and the BEAST 1.7. *Molecular Biology and Evolution* 29:1969–73.
- 777 Edwards, S. V., L. Liu, and D. K. Pearl. 2007. High-resolution species trees without  
778 concatenation. *Proceedings of the National Academy of Sciences* 104:5936–5941.
- 779 Eriksson, J. S., J. L. Blanco-Pastor, F. Sousa, Y. J. Bertrand, and B. E. Pfeil. 2017. A  
780 cryptic species produced by autopolyploidy and subsequent introgression involving  
781 *Medicago prostrata* (Fabaceae). *Molecular Phylogenetics and Evolution* 107:367–381.
- 782 Faircloth, B. C. 2015. PHYLUCE is a software package for the analysis of conserved  
783 genomic loci. *Bioinformatics* 32:786–788.
- 784 Faircloth, B. C., J. E. McCormack, N. G. Crawford, M. G. Harvey, R. T. Brumfield, and  
785 T. C. Glenn. 2012. Ultraconserved elements anchor thousands of genetic markers  
786 spanning multiple evolutionary timescales. *Systematic Biology* 61:717–26.

- 787 Faircloth, B. C., L. Sorenson, F. Santini, and M. E. Alfaro. 2013. A phylogenomic  
788 perspective on the radiation of ray-finned fishes based upon targeted sequencing of  
789 ultraconserved elements (UCEs). PLoS ONE 8:e65923.
- 790 Felsenstein, J. 2005. Phylip (phylogeny inference package) version 3.6. distributed by the  
791 author. dep genome sci univ washington, seattle.
- 792 Fernandes, A. M., M. Wink, and A. Aleixo. 2012. Phylogeography of the chestnut-tailed  
793 antbird (*Myrmeciza hemimelaena*) clarifies the role of rivers in Amazonian biogeography.  
794 Journal of Biogeography 39:1524–1535.
- 795 Garrick, R. C., P. Sunnucks, and R. J. Dyer. 2010. Nuclear gene phylogeography using  
796 PHASE: dealing with unresolved genotypes, lost alleles, and systematic bias in  
797 parameter estimation. BMC Evolutionary Biology 10:118.
- 798 Giarla, T. C. and J. A. Esselstyn. 2015. The challenges of resolving a rapid, recent  
799 radiation: empirical and simulated phylogenomics of philippine shrews. Systematic  
800 Biology 64:727–740.
- 801 Gnrke, A., A. Melnikov, J. Maguire, P. Rogov, E. M. LeProust, W. Brockman, T. Fennell,  
802 G. Giannoukos, S. Fisher, C. Russ, S. Gabriel, D. B. Jaffe, E. S. Lander, and  
803 C. Nusbaum. 2009. Solution hybrid selection with ultra-long oligonucleotides for  
804 massively parallel targeted sequencing. Nature Biotechnology 27:182–189.
- 805 Harvey, M. G., B. T. Smith, T. C. Glenn, B. C. Faircloth, and R. T. Brumfield. 2016.  
806 Sequence capture versus restriction site associated DNA sequencing for shallow  
807 systematics. Systematic Biology Advance Access syw036.
- 808 Hayes, F. E. and J. A. N. Sewlal. 2004. The Amazon River as a dispersal barrier to



- 809 passerine birds: effects of river width, habitat and taxonomy. *Journal of Biogeography*  
810 31:1809–1818.
- 811 He, D., A. Choi, K. Pipatsrisawat, A. Darwiche, and E. Eskin. 2010. Optimal algorithms  
812 for haplotype assembly from whole-genome sequence data. *Bioinformatics* 26:i183–i190.
- 813 Hu, D.-S., L. Joseph, and D. J. Agro. 2000. Distribution, variation, and taxonomy of  
814 *Topaza* Hummingbirds (Aves: Trochilidae). *Ornitologia Neotropical* 11:123–142.
- 815 Iqbal, Z., M. Caccamo, I. Turner, P. Flicek, and G. McVean. 2012. De novo assembly and  
816 genotyping of variants using colored de Bruijn graphs. *Nature Genetics* 44:226–232.
- 817 Jones, G. 2017. Algorithmic improvements to species delimitation and phylogeny estimation  
818 under the multispecies coalescent. *Journal of Mathematical Biology* 74:447–467.
- 819 Jones, G., Z. Aydin, and B. Oxelman. 2014. DISSECT: an assignment-free Bayesian  
820 discovery method for species delimitation under the multispecies coalescent.  
821 *Bioinformatics* 31:991–998.
- 822 Katoh, K., G. Asimenos, and H. Toh. 2009. Multiple alignment of DNA sequences with  
823 MAFFT. *Methods in Molecular Biology* 537:39–64.
- 824 Kolaczkowski, B. and J. W. Thornton. 2004. Performance of maximum parsimony and  
825 likelihood phylogenetics when evolution is heterogeneous. *Nature* 431:980–984.
- 826 Kubatko, L. S. and J. H. Degnan. 2007. Inconsistency of Phylogenetic Estimates from  
827 Concatenated Data under Coalescence. *Systematic Biology* 56:17–24.
- 828 Leaché, A. D., B. L. Banbury, J. Felsenstein, A. N. M. De Oca, and A. Stamatakis. 2015.  
829 Short tree, long tree, right tree, wrong tree: New acquisition bias corrections for inferring  
830 SNP phylogenies. *Systematic Biology* 64:1032–1047.

- 831 Leaché, A. D. and J. R. Oaks. 2017. The Utility of Single Nucleotide Polymorphism (SNP)  
832 Data in Phylogenetics. *Annual Review of Ecology, Evolution, and Systematics* 48:69–84.
- 833 Lerner, H. R., M. Meyer, H. F. James, M. Hofreiter, and R. C. Fleischer. 2011. Multilocus  
834 resolution of phylogeny and timescale in the extant adaptive radiation of Hawaiian  
835 honeycreepers. *Current Biology* 21:1838–1844.
- 836 Li, H. and R. Durbin. 2010. Fast and accurate long-read alignment with Burrows-Wheeler  
837 transform. *Bioinformatics* 26:589–595.
- 838 Li, H., B. Handsaker, A. Wysoker, T. Fennell, J. Ruan, N. Homer, G. Marth, G. Abecasis,  
839 and R. Durbin. 2009. The Sequence Alignment/Map format and SAMtools.  
840 *Bioinformatics* 25:2078–9.
- 841 Lischer, H. E., L. Excoffier, and G. Heckel. 2014. Ignoring heterozygous sites biases  
842 phylogenomic estimates of divergence times: Implications for the evolutionary history of  
843 *Microtus voles*. *Molecular Biology and Evolution* 31:817–831.
- 844 Manthey, J. D., L. C. Campillo, K. J. Burns, and R. G. Moyle. 2016. Comparison of  
845 target-capture and restriction-site associated DNA sequencing for phylogenomics: a test  
846 in cardinalid tanagers (Aves, Genus: *Piranga*). *Systematic Biology Advance Access*  
847 *syw005*.
- 848 McCormack, J. E., B. C. Faircloth, N. G. Crawford, P. A. Gowaty, R. T. Brumfield, and  
849 T. C. Glenn. 2012. Ultraconserved elements are novel phylogenomic markers that resolve  
850 placental mammal phylogeny when combined with species-tree analysis. *Genome*  
851 *Research* 22:746–754.
- 852 McGuire, J., C. C. Witt, J. V. Remsen, A. Corl, D. L. Rabosky, D. L. Altshuler, and

- 853 R. Dudley. 2014. Molecular phylogenetics and the diversification of hummingbirds.  
854 *Current Biology* 24:910–916.
- 855 McKenna, A., M. Hanna, E. Banks, A. Sivachenko, K. Cibulskis, A. Kernytsky,  
856 K. Garimella, D. Altshuler, S. Gabriel, M. Daly, and M. A. DePristo. 2010. The Genome  
857 Analysis Toolkit: a MapReduce framework for analyzing next-generation DNA  
858 sequencing data. *Genome research* 20:1297–303.
- 859 Meiklejohn, K. A., B. C. Faircloth, T. C. Glenn, R. T. Kimball, and E. L. Braun. 2016.  
860 Analysis of a rapid evolutionary radiation using ultraconserved elements (UCEs):  
861 Evidence for a bias in some multispecies coalescent methods. *Systematic Biology*  
862 Advance Access syw014.
- 863 Milne, I., G. Stephen, M. Bayer, P. J. A. Cock, L. Pritchard, L. Cardle, P. D. Shaw, and  
864 D. Marshall. 2013. Using Tablet for visual exploration of second-generation sequencing  
865 data. *Briefings in Bioinformatics* 14:193–202.
- 866 Mirarab, S., R. Reaz, M. S. Bayzid, T. Zimmermann, M. S. Swenson, and T. Warnow.  
867 2014. ASTRAL: genome-scale coalescent-based species tree estimation. *Bioinformatics*  
868 30:541–548.
- 869 Moore, R. P., W. D. Robinson, I. J. Lovette, and T. R. Robinson. 2008. Experimental  
870 evidence for extreme dispersal limitation in tropical forest birds. *Ecology Letters*  
871 11:960–968.
- 872 Mossel, E. and E. Vigoda. 2005. Phylogenetic MCMC algorithms are misleading on  
873 mixtures of trees. *Science* 309:2207–9.
- 874 Ornés-Schmitz, A. and K. L. Schuchmann. 2011. Taxonomic review and phylogeny of the

- 875 hummingbird genus *Topaza* (Gray, 1840) using plumage color spectral information.  
876 *Ornitologia Neotropical* Pages 25–38.
- 877 Peters, J. L. 1945. Check-list of birds of the world. Volume 5 ed. Harvard Univ. Press,  
878 Cambridge, Massachusetts.
- 879 Potts, A. J., T. A. Hedderson, and G. W. Grimm. 2014. Constructing Phylogenies in the  
880 Presence Of Intra-Individual Site Polymorphisms (2ISPs) with a Focus on the Nuclear  
881 Ribosomal Cistron. *Systematic Biology* 63:1–16.
- 882 Rambaut, A., M. A. Suchard, W. Xie, and A. Drummond. 2013. Tracer v1.6.
- 883 Rannala, B. and Z. Yang. 2003. Bayes estimation of species divergence times and ancestral  
884 population sizes using DNA sequences from multiple loci. *Genetics* 164:1645–1656.
- 885 Remsen, J. V. and T. A. Parker. 1983. Contribution of river-created habitats to bird  
886 species richness in Amazonia. *Biotropica* 15:223–231.
- 887 Ribas, C. C., a. Aleixo, a. C. R. Nogueira, C. Y. Miyaki, and J. Cracraft. 2012. A  
888 palaeobiogeographic model for biotic diversification within Amazonia over the past three  
889 million years. *Proceedings of the Royal Society B: Biological Sciences* 279:681–689.
- 890 Russell, R. W., F. L. Carpenter, M. A. Hixon, and D. C. Paton. 1994. The impact of  
891 variation in stopover habitat quality on migrant rufous hummingbirds. *Conservation*  
892 *Biology* 8:483–490.
- 893 Schrempf, D., B. Q. Minh, N. De Maio, A. von Haeseler, and C. Kosiol. 2016. Reversible  
894 polymorphism-aware phylogenetic models and their application to tree inference. *Journal*  
895 *of Theoretical Biology* 407:362–370.

- 896 Schuchmann, K., G. Kirwan, and P. Boesman. 2016. Crimson Topaz (*Topaza pella*). *in*  
897 Handbook of the Birds of the World Alive (J. del Hoyo, A. Elliott, J. Sargatal,  
898 D. Christie, and E. de Juana, eds.). Lynx Edicions, Barcelona, Spain.
- 899 Schuchmann, K. L. 1999. Family Trochilidae (hummingbirds). Pages 468–680 *in* Handbook  
900 of the Birds of the World Alive (J. del Hoyo, A. Elliott, and J. Sargatal, eds.) volume 5  
901 ed. Lynx Edicions, Barcelona, Spain.
- 902 Simpson, J. T., K. Wong, S. D. Jackman, J. E. Schein, S. J. M. Jones, and I. Birol. 2009.  
903 ABySS: a parallel assembler for short read sequence data. *Genome Research* 19:1117–23.
- 904 Smith, B. T., M. G. Harvey, B. C. Faircloth, T. C. Glenn, and R. T. Brumfield. 2014.  
905 Target capture and massively parallel sequencing of ultraconserved elements for  
906 comparative studies at shallow evolutionary time scales. *Systematic Biology* 63:83–95.
- 907 Sullivan, B. L., C. L. Wood, M. J. Iliff, R. E. Bonney, D. Fink, and S. Kelling. 2009. eBird:  
908 A citizen-based bird observation network in the biological sciences. *Biological*  
909 *Conservation* 142:2282–2292.
- 910 Thom, G. and A. Aleixo. 2015. Cryptic speciation in the white-shouldered antshrike  
911 (*Thamnophilus aethiops*, Aves - Thamnophilidae): The tale of a transcontinental  
912 radiation across rivers in lowland Amazonia and the northeastern Atlantic Forest.  
913 *Molecular Phylogenetics and Evolution* 82:95–110.
- 914 Wyman, S. K., R. K. Jansen, and J. L. Boore. 2004. Automatic annotation of organellar  
915 genomes with DOGMA. *Bioinformatics* 20:3252–5.
- 916 Yang, Z. 2015. The BPP program for species tree estimation and species delimitation.  
917 *Current Zoology* 61:854–865.

918 Yu, L., Y.-W. Li, O. a. Ryder, and Y.-P. Zhang. 2007. Analysis of complete mitochondrial  
919 genome sequences increases phylogenetic resolution of bears (Ursidae), a mammalian  
920 family that experienced rapid speciation. *BMC Evolutionary Biology* 7:198.
